# Supplementary material
Source: PubMed Central journal article supplement (PMC4245844)

## Supplementary Data

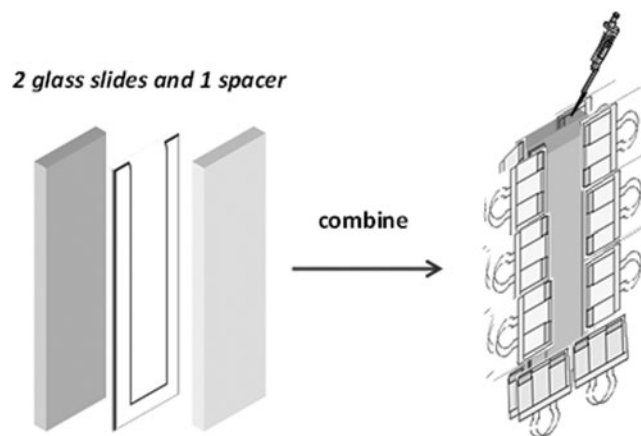

**SUPPLEMENTARY FIG. S1.** Apparatus for making 2D hydrogel surface.

Supplement: Supp_Fig1.pdf [file Supp_Fig1.pdf]

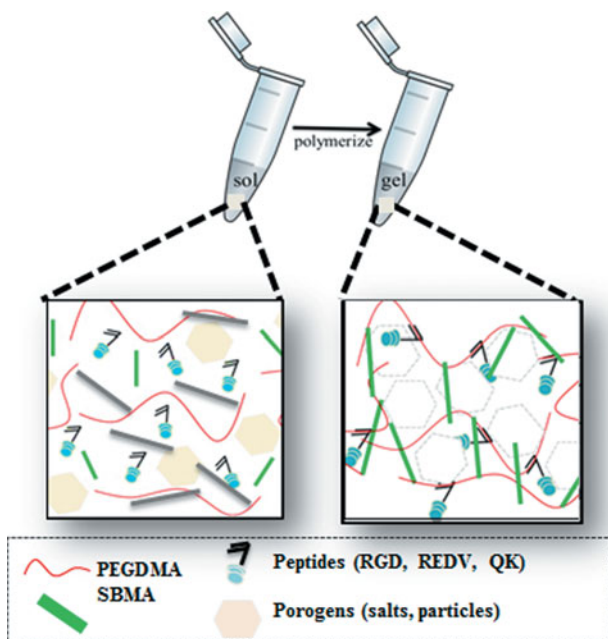

**SUPPLEMENTARY FIG. S2.** Illustration of 3D porous hydrogels.

Supplement: Supp_Fig2.pdf [file Supp_Fig2.pdf]

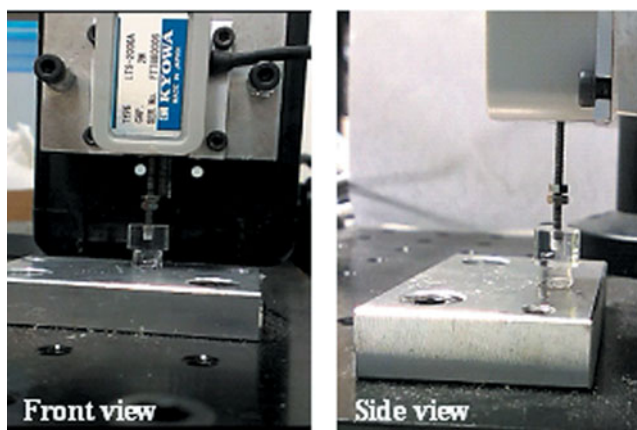

**SUPPLEMENTARY FIG. S3.** Experimental setup of load cell (*top*) and hydrogel (*bottom*).

Supplement: Supp_Fig3.pdf [file Supp_Fig3.pdf]
